# Supplementary material for: Settling taxonomic and nomenclatural problems in brine shrimps,Artemia(Crustacea: Branchiopoda: Anostraca), by integrating mitogenomics, marker discordances and nomenclature rules
Source: PeerJ journal article supplement (doi:10.7717/peerj.10865), 2021-03-10

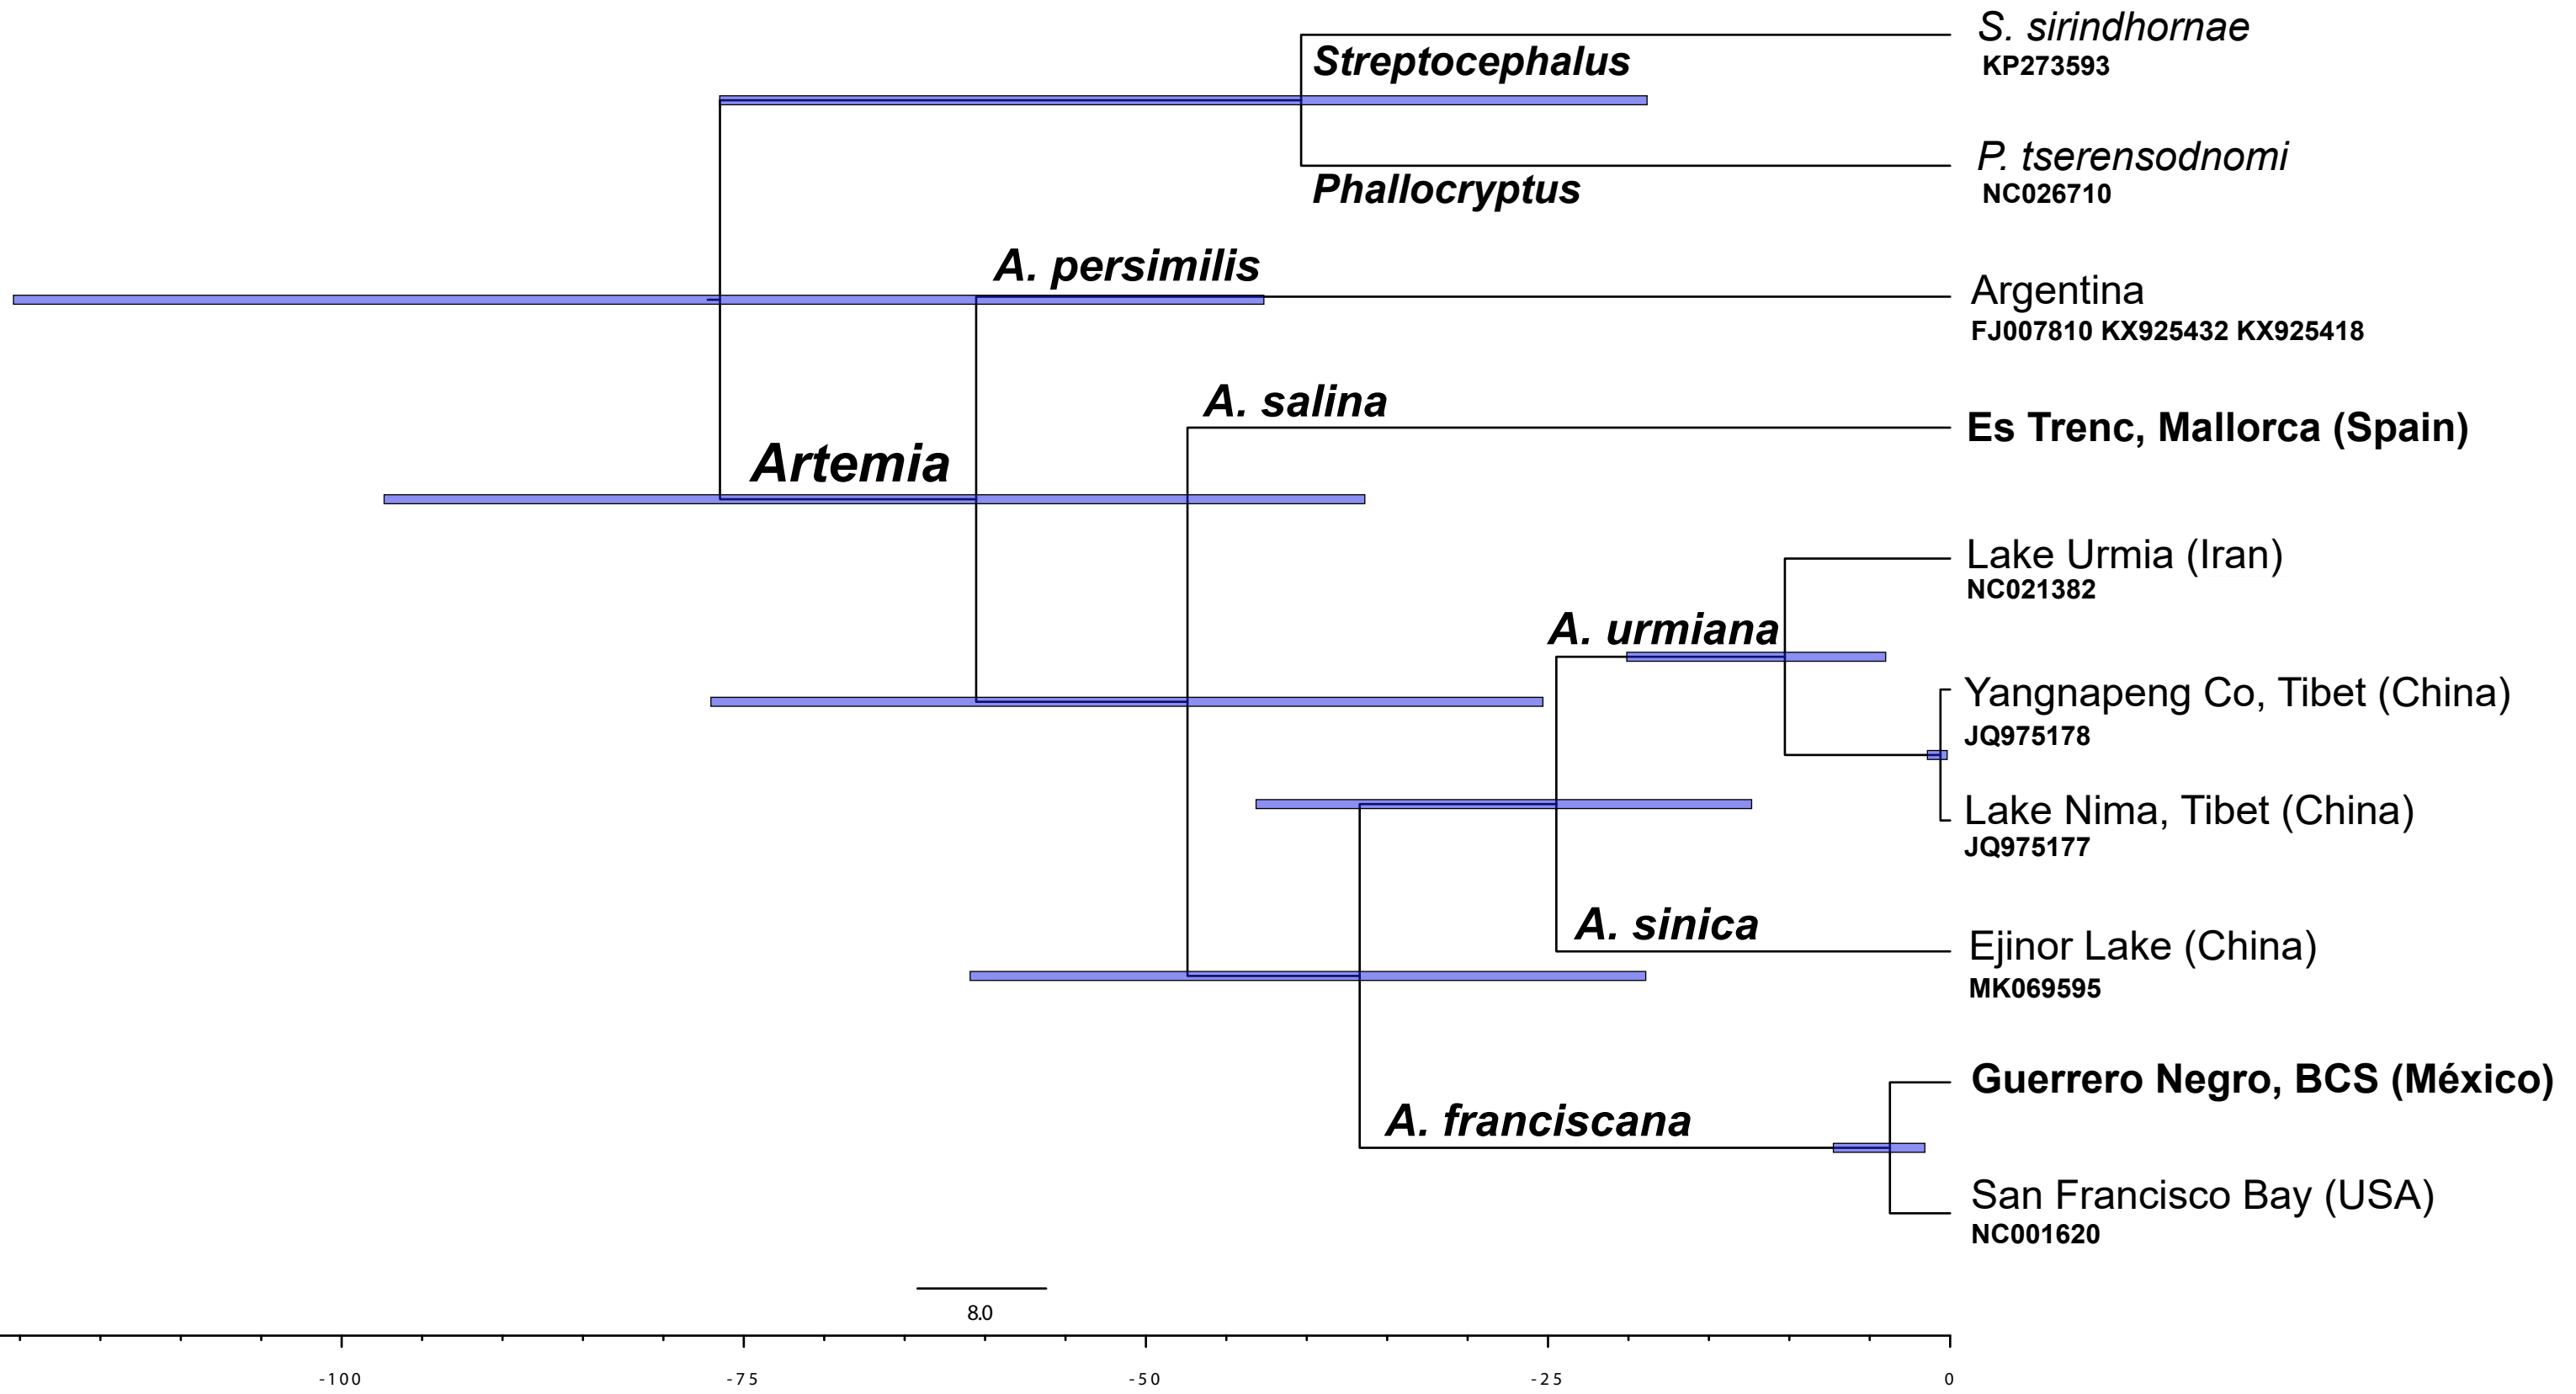

Supplement: FigureS4_PeerJ_resubmission.pdf [file FigureS4_PeerJ_resubmission.pdf]
